# Supplementary material for: Ralstonia solanacearum Suppresses Tomato Root Growth by Downregulation of a Wall-Associated Receptor Kinase
Source: MDPI journal article supplement (doi:10.3390/plants12203600), 2023-10-17
Supplement: s1 [file s1]

Table S4. Bacterial strains and plasmids used in this study

| Strains or plasmids              | Relevant characteristics                                                                                                       | Resources  |
|----------------------------------|--------------------------------------------------------------------------------------------------------------------------------|------------|
| <b>Strains</b>                   |                                                                                                                                |            |
| <i>Ralstonia solanacearum</i>    |                                                                                                                                |            |
| GMI1000                          | Wild-type, phylotype I, biovar 3, race 1                                                                                       | [1]        |
| $\Delta hrpB$                    | Km <sup>r</sup> , a insertion mutant of <i>hrpB</i> gene derived from GMI1000                                                  | This study |
| <i>Escherichia coli</i>          |                                                                                                                                |            |
| DH5 $\alpha$                     | F <sup>-</sup> <i>recA hsdR17 (rk<sup>-</sup>, mk<sup>+</sup>) <math>\phi</math>80lacZ<math>\Delta</math>M15</i>               | Clontech   |
| S17-1                            | $\lambda$ pir <i>hsdR pro thi</i> ;Tc::Mu Km::Tn7                                                                              | Lab store  |
| <i>Agrobacterium tumefaciens</i> |                                                                                                                                |            |
| GV3101                           | Rif <sup>r</sup> , with Ti plasmid pMP90                                                                                       | Lab store  |
| <b>Plasmids</b>                  |                                                                                                                                |            |
| pK19mobGII                       | Km <sup>r</sup> , a suicide vector carrying a <i>gusA</i> reporter gene                                                        | [2]        |
| pK19-hrpB                        | Km <sup>r</sup> , a 696-bp <i>hrpB</i> gene fragment cloned in pK19mobGII                                                      | This study |
| TRV1                             | Km <sup>r</sup> , a VIGS vector encoding the replication, movement and cysteine-rich protein proteoins of tobacco rattle virus | [3]        |
| TRV2                             | Km <sup>r</sup> , a VIGS vector harboring the coat protein and two non-structural proteins of tobacco rattle virus             | [3]        |
| TRV: <i>PDS</i>                  | Km <sup>r</sup> , TRV2 carrying tomato <i>PDS</i>                                                                              | [3]        |
| TRV: <i>gfp</i>                  | Km <sup>r</sup> , a 358-bp fragment of <i>gfp</i> gene cloned in TRV2                                                          | [4]        |
| TRV: <i>SlWAKL20</i>             | Km <sup>r</sup> , a 300-bp <i>SlWAKL20</i> gene cloned in TRV2 at <i>Eco</i> RI/ <i>Bam</i> HI sites                           | This study |
| TRV: <i>NbWAKL20</i>             | Km <sup>r</sup> , a 305-bp fragment of <i>Niben101Scf00369g24023.1</i> gene cloned in TRV2                                     | This study |

## References

- [1] Boucher, C.A.; Barberis, P.A.; Trigalet, A.P.; Demery, D.A. Transposon mutagenesis of *Pseudomonas solanacearum*: isolation of Tn5-induced avirulent mutants. *J. Gen. Microbiol.* **1985**,

131, 2449–2457.

- [2] Katzen, F.; Becker, A.; Ielmini, M.; Oddo, C.G.; Ielpiet, L. New mobilizable vectors suitable for gene replacement in gram-negative bacteria and their use in mapping of the 3' end of the *Xanthomonas campestris* pv. *campestris* gum operon. *Appl. Environ. Microbiol.* **1999**, *65*, 278-282
- [3] Liu, Y.; Schiff, M.; Dinesh-Kumar, S.P. Virus-induced gene silencing in tomato. *Plant J.* **2002**, *31*, 777-786.
- [4] Sun, T.; Wu, W.; Wu, H.; Rou, W.; Zhou, Y.; Zhuo, T.; Fan, X.; Hu, X.; Zou, H.S. *Ralstonia solanacearum* elicitor RipX induces defense reaction by suppressing the mitochondrial *atpA* Gene in host plant. *Int. J. Mol. Sci.* **2020**, *21*, 2000.
