# Supplementary material for: Ralstonia solanacearum Suppresses Tomato Root Growth by Downregulation of a Wall-Associated Receptor Kinase
Source: MDPI journal article supplement (doi:10.3390/plants12203600), 2023-10-17
Supplement: s1 [file s1]

Table S5. Primers used for molecular cloning and qRT-PCR in this study

| Primer pair                        | Sequence(5'-3')                                                       | Cutting sites                     | Description or purpose                              |
|------------------------------------|-----------------------------------------------------------------------|-----------------------------------|-----------------------------------------------------|
| Primers used for molecular cloning |                                                                       |                                   |                                                     |
| hrpB-F/hrpB-R                      | TACGAATTCGCCGTGCAGGCCGGCA<br>CCTGCAGCGCGCTCGGTACAGTT                  | <i>Eco</i> RI- <i>Pst</i> I       | A 696-bp <i>hrpB</i> gene cloned in pK19mpbGII      |
| TRV-SIWAKL20-F/<br>TRV-SIWAKL20-F  | GCGAATTCCTTAGAGTTCTTGTCATCTGTGGG<br>GCGGATCCACAATGTGTTCTTACAGTTCCTTCC | <i>Eco</i> RI- <i>Bam</i> HI      | A 300-bp fragment of <i>SIWAKL20</i> cloned in TRV2 |
| TRV-NbWAKL20-F/<br>TRV-NbWAKL20-R  | CGGAATTCGTGATTTATCTTTAGGTGGC/<br>TCGGATCCATGCACTAATGGAGTCTTCAG        | <i>Eco</i> RI- <i>Bam</i> HI      | A 305-bp fragment of <i>NbWAKL20</i> cloned in TRV2 |
| Primers used for PCR analysis      |                                                                       |                                   |                                                     |
| Gene                               | Sequence(5'-3')                                                       | Description                       |                                                     |
| gusA-F/gusA-R                      | TCCTGTAGAAACCCCAACCC; CAGTTCATAGAGATAACCTTCACCC                       | 748-bp of partial <i>GUS</i> gene |                                                     |
| qRT-ripAA                          | GACAAGCGGCTGGGAATACA; GTGCTGGTCGGGATAAACAT                            | 91-bp                             |                                                     |
| qRT-ripP1                          | CTGGAGATGTCGGCGGTG; GCGCTTGGCGTCTTCATAG                               | 138-bp                            |                                                     |
| qRT-ripI                           | CAGTTGCGCCTCCATGAGT; GCTCGGTCTTCAGGTTCCA                              | 91-bp                             |                                                     |
| qRT-gyrA                           | CGACTGGAACCGTCCCTAC; TCCGCACGATGGTGTGATA                              | 104-bp                            |                                                     |
| qRT-SIWAKL20                       | AACATATCTTCGCGTAATACGGTCA;CTTCATTAGCTTCCTCGAATCGCCT                   | 92-bp                             |                                                     |
| qRT-SlActin                        | ATGTTGCTATTCAGGCGGTTTTGTC;CAGGATTTTCATCAGACAGTCAGTA                   | 182-bp                            |                                                     |
| qRT-NbEF1 $\alpha$                 | TGGTGTCTCAAGCCTGGTATGGTTG;ACGCTTGAGATCCTTAACCGCAACATTCTT              | 160-bp                            |                                                     |
| qRT-NbWAKL20                       | CTTAGAGTTCTTGTCCTCCGTAGGA;GTATGGAAGGAGGGCTAATAACAAG                   | 92-bp                             |                                                     |
